# Supplementary material for: LUBAC assembles a signaling platform at mitochondria for signal amplification and shuttling of NF-ĸB to the nucleus
Source: bioRxiv or medRxiv preprint supplement (doi:10.1101/2022.05.27.493704), 2022-05-28
Supplement: Supplementary file [file media-1.pdf]

A

| Accession | Proteine Name                                                                | Gene Name | $\bar{X}$ iBAQ |
|-----------|------------------------------------------------------------------------------|-----------|----------------|
| Q96BN8    | Ubiquitin thioesterase otulin                                                | OTULIN    | 19.52          |
| Q96L92    | Sorting nexin-27                                                             | SNX27     | 18.75          |
| O15347    | High mobility group protein B3                                               | HMGB3     | 16.69          |
| Q16718*   | NADH dehydrogenase [ubiquinone] 1 alpha subcomplex subunit 5                 | NDUFA5    | 15.28          |
| Q9Y3D3*   | 28S ribosomal protein S16                                                    | MRPS16    | 15.25          |
| O14828    | Secretory carrier-associated membrane protein 3                              | SCAMP3    | 15.23          |
| O00264*   | Membrane-associated progesterone receptor component 1                        | PGRMC1    | 15.21          |
| P40616    | ADP-ribosylation factor-like protein 1                                       | ARL1      | 15.19          |
| P62495    | Eukaryotic peptide chain release factor subunit 1                            | ETF1      | 15.14          |
| P61421    | V-type proton ATPase subunit d 1                                             | ATP6V0D1  | 14.91          |
| P20618    | Proteasome subunit beta type-1                                               | PSMB1     | 14.64          |
| Q9HB71    | Calcyclin-binding protein                                                    | CACYBP    | 14.58          |
| P56556*   | NADH dehydrogenase [ubiquinone] 1 alpha subcomplex subunit 6                 | NDUFA6    | 14.51          |
| P51570    | Galactokinase                                                                | GALK1     | 14.44          |
| P08243    | Asparagine synthetase [glutamine-hydrolyzing]                                | ASNS      | 14.39          |
| Q9BTV4    | Transmembrane protein 43                                                     | TMEM43    | 14.38          |
| O15173    | Membrane-associated progesterone receptor component 2                        | PGRMC2    | 14.27          |
| P30040    | Endoplasmic reticulum resident protein 29                                    | ERP29     | 14.01          |
| P00387*   | NADH-cytochrome b5 reductase 3                                               | CYB5R3    | 13.98          |
| Q9Y3B4    | Splicing factor 3B subunit 6                                                 | SF3B6     | 13.96          |
| Q96EP0    | E3 ubiquitin-protein ligase RNF31                                            | RNF31     | 13.89          |
| Q9HD45    | Transmembrane 9 superfamily member 3                                         | TM9SF3    | 13.64          |
| P82664*   | 28S ribosomal protein S10                                                    | MRPS10    | 13.45          |
| Q9UHI6    | Probable ATP-dependent RNA helicase DDX20                                    | DDX20     | 13.44          |
| P50995    | Annexin A11                                                                  | ANXA11    | 13.41          |
| O95470    | Sphingosine-1-phosphate lyase 1                                              | SGPL1     | 13.21          |
| P46977    | Dolichyl-diphosphooligosaccharide--protein glycosyltransferase subunit STT3A | STT3A     | 13.13          |
| O00505    | Importin subunit alpha-4                                                     | KPNA3     | 13.09          |
| P31153    | S-adenosylmethionine synthase isoform type-2                                 | MAT2A     | 13.04          |
| P28331*   | NADH-ubiquinone oxidoreductase 75 kDa subunit                                | NDUFS1    | 12.93          |
| O60841    | Eukaryotic translation initiation factor 5B                                  | EIF5B     | 12.91          |
| O14734    | Acyl-coenzyme A thioesterase 8                                               | ACOT8     | 12.89          |
| Q8NF37    | Lysophosphatidylcholine acyltransferase 1                                    | LPCAT1    | 12.83          |
| P36507    | Dual specificity mitogen-activated protein kinase kinase 2                   | MAP2K2    | 12.79          |
| Q8IXH7    | Negative elongation factor C/D                                               | NELFCD    | 12.75          |
| P82663*   | 28S ribosomal protein S25                                                    | MRPS25    | 12.66          |
| Q01581    | Hydroxymethylglutaryl-CoA synthase                                           | HMGCS1    | 12.65          |
| P48730    | Casein kinase I isoform delta                                                | CSNK1D    | 12.63          |
| Q86W42    | THO complex subunit 6 homolog                                                | THOC6     | 12.62          |
| Q9NRK6*   | ATP-binding cassette sub-family B member 10                                  | ABCB10    | 12.50          |
| Q9H5Q4*   | Dimethyladenosine transferase 2                                              | TFB2M     | 12.49          |
| P04350    | Tubulin beta-4A chain                                                        | TUBB4A    | 12.32          |
| Q96EY7*   | Pentatricopeptide repeat domain-containing protein 3                         | PTCD3     | 12.16          |
| Q96DV4*   | 39S ribosomal protein L38                                                    | MRPL38    | 12.15          |
| Q9BUQ8    | Probable ATP-dependent RNA helicase DDX23                                    | DDX23     | 12.11          |
| Q8N163    | Cell cycle and apoptosis regulator protein 2                                 | CCAR2     | 12.04          |
| Q8WWY3    | U4/U6 small nuclear ribonucleoprotein Prp31                                  | PRPF31    | 11.90          |
| P23921    | Ribonucleoside-diphosphate reductase large subunit                           | RRM1      | 11.59          |
| Q9Y6N5*   | Sulfide:quinone oxidoreductase                                               | SQRDL     | 11.52          |
| Q06210    | Glutamine--fructose-6-phosphate aminotransferase                             | GFPT1     | 11.49          |
| Q05397    | Focal adhesion kinase 1                                                      | PTK2      | 11.33          |
| P25685    | DnaJ homolog subfamily B member 1                                            | DNAJB1    | 11.26          |
| Q969Z0*   | FAST kinase domain-containing protein 4                                      | TBRG4     | 11.21          |
| Q3SY69*   | Mitochondrial 10-formyltetrahydrofolate dehydrogenase                        | ALDH1L2   | 11.10          |
| O60701    | UDP-glucose 6-dehydrogenase                                                  | UGDH      | 11.09          |
| O94826*   | Mitochondrial import receptor subunit TOM70                                  | TOMM70A   | 10.89          |
| Q13085    | Acetyl-CoA carboxylase 1                                                     | ACACA     | 10.26          |
| O75122    | CLIP-associating protein 2                                                   | CLASP2    | 10.06          |
| Q6P0Q8    | Microtubule-associated serine/threonine-protein kinase 2                     | MAST2     | 9.90           |
| Q29RF7    | Sister chromatid cohesion protein PDS5 homolog A                             | PDS5A     | 9.82           |

B

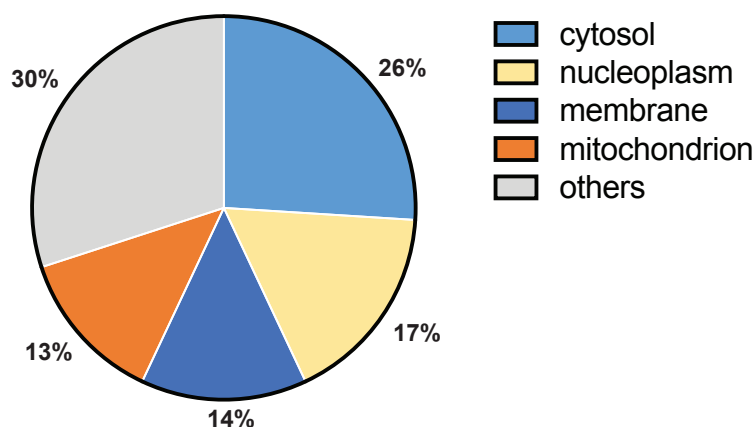

**A**

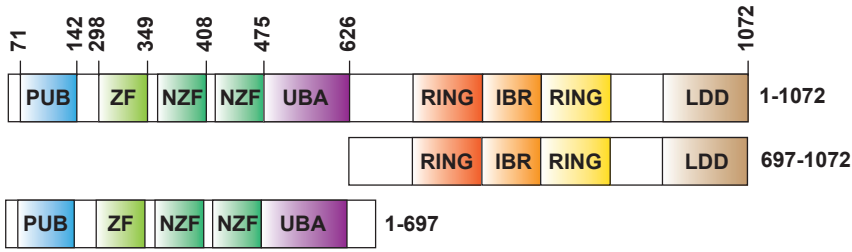

**B**

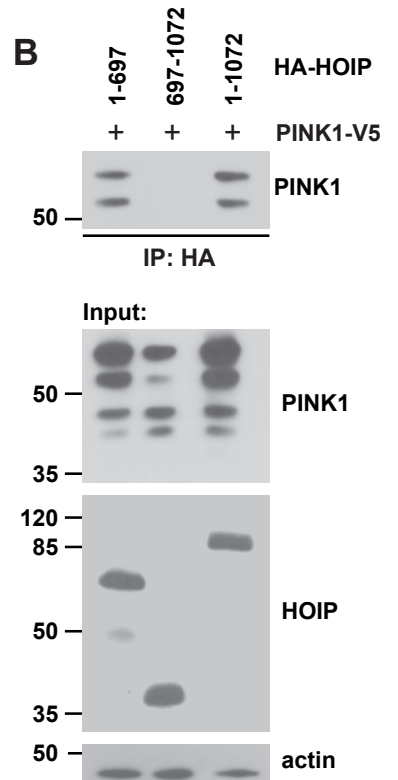

**C**

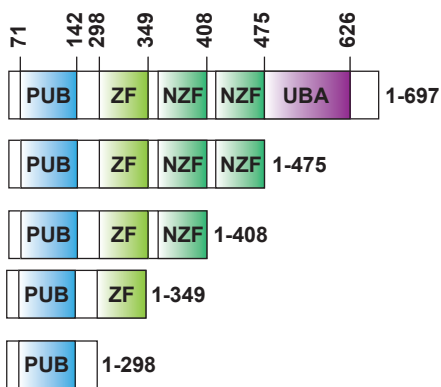

**D**

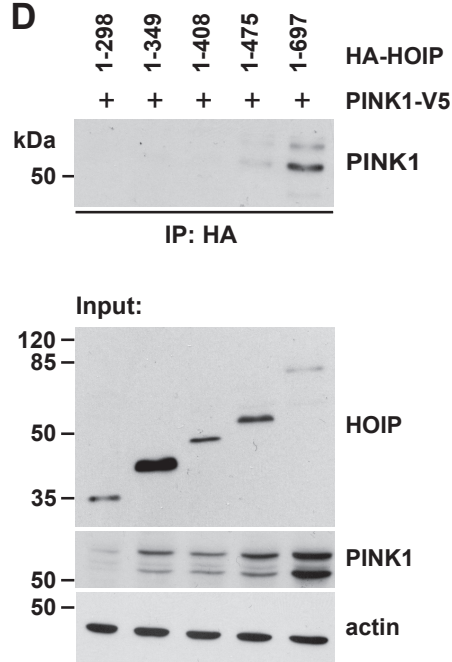

**E**

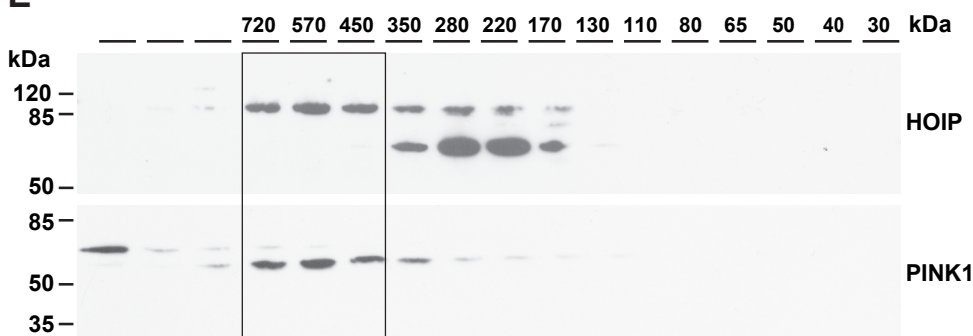

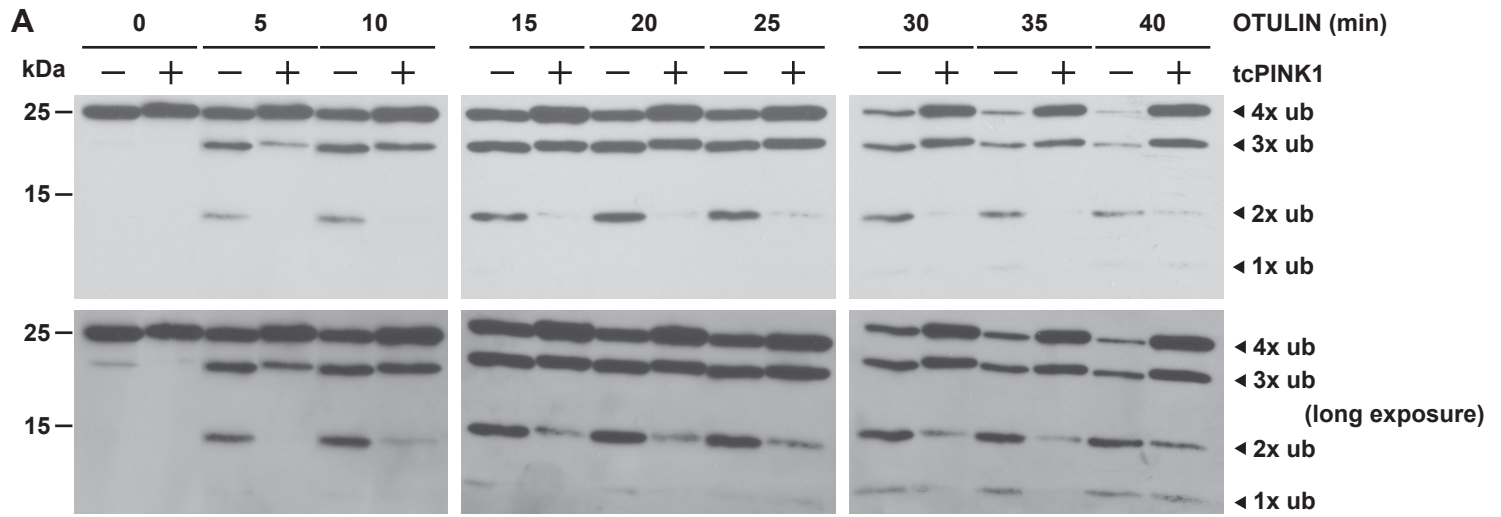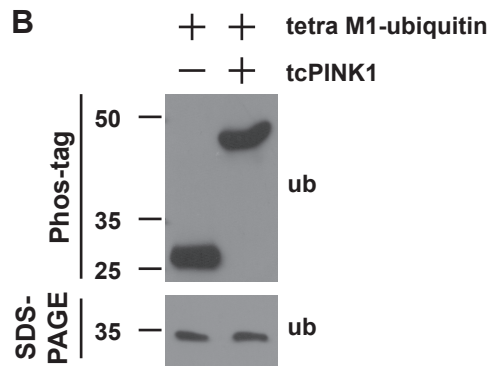

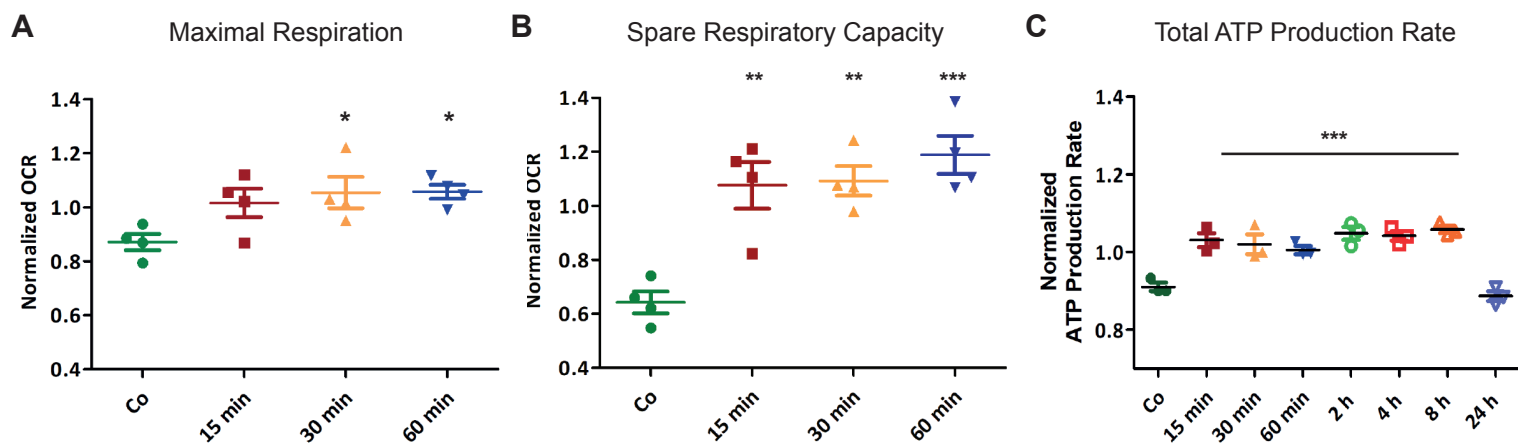

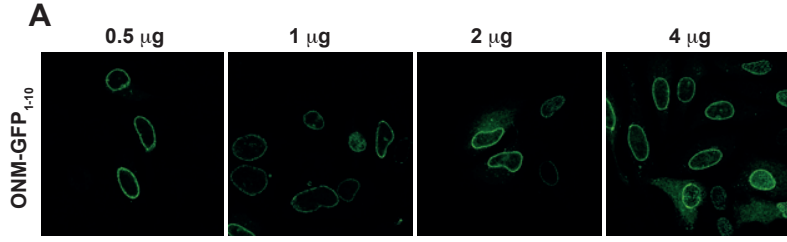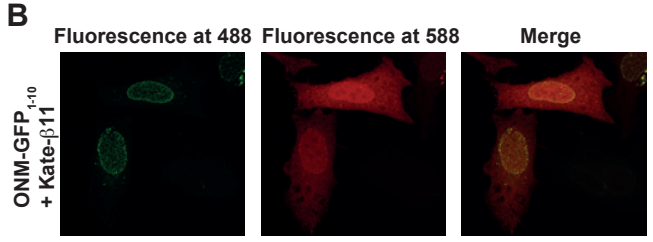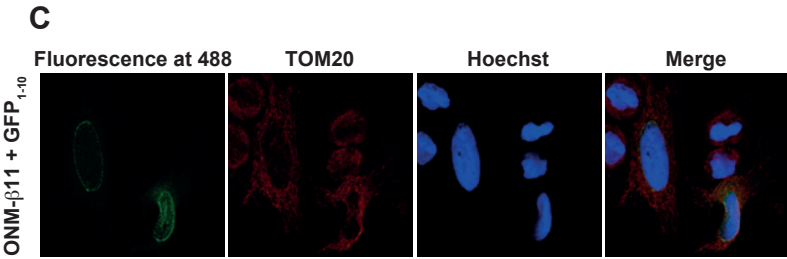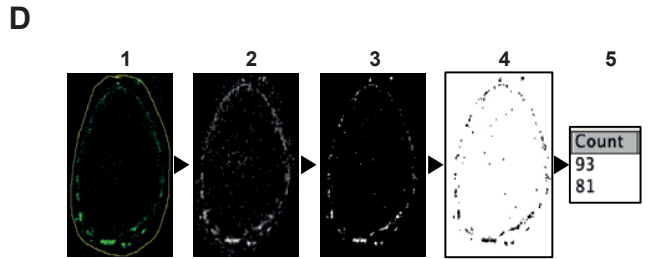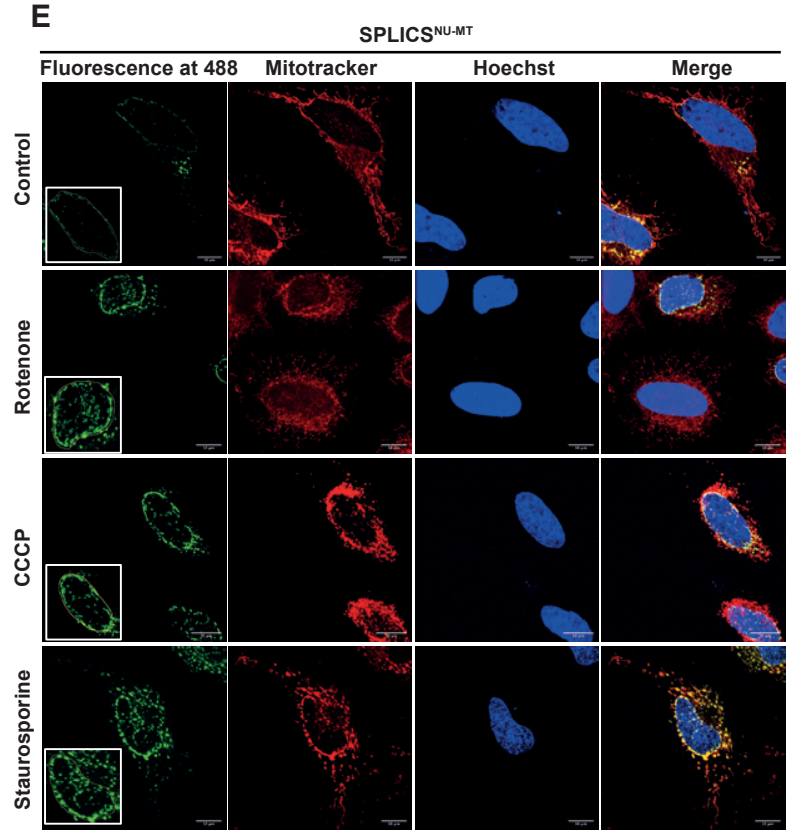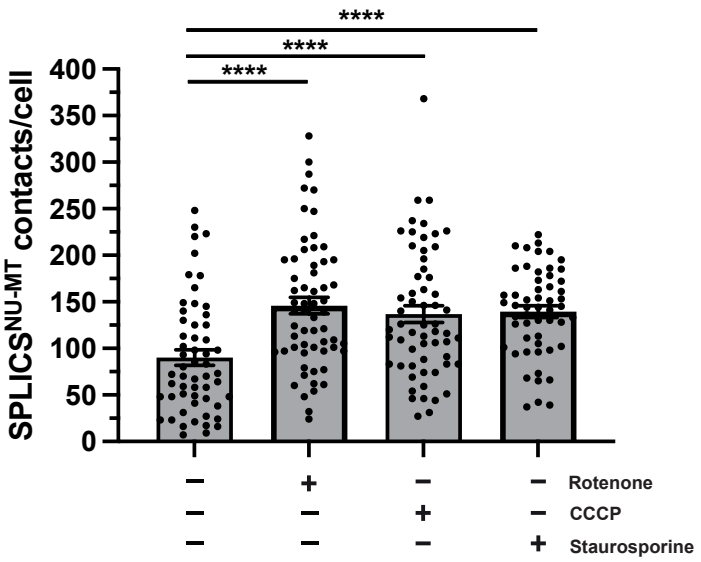

## SUPPLEMENTARY FIGURE LEGENDS

### Suppl. Figure 1. Identification of OTULIN-interacting proteins by mass spectrometry

**S1A. OTULIN-interacting proteins.** Proteins identified by co-immunoprecipitation coupled to mass spectrometry analysis using strict filter criteria. Only proteins that were not identified in the control and that were reliably identified in both OTULIN co-immunoprecipitations by at least two unique peptides are listed according to their abundance (iBAQ-value). Mitochondria-associated proteins are marked with asterisk.

**S1B. Gene Ontology cellular compartment (GOCC) characterization of OTULIN-interacting proteins.** The GOCC classifications for each of the identified proteins were performed using DAVID.

### Suppl. Figure 2. PINK1 interacts with the N-terminal part of HOIP including the UBA domain

**S2A, C. Schematic representation of the HOIP constructs used to map the interaction between HOIP and PINK1.** All constructs are equipped with an N-terminal HA-tag. PUB: peptide N- glycosidase/ubiquitin-associated domain; ZF: zinc finger domain; NZF: nuclear protein localization 4-type zinc finger domain; UBA: ubiquitin-associated domain; RING: really interesting new gene; IBR: in-between RING domain; LDD: linear ubiquitin chain determining domain.

**S2B. PINK1 co-immunoprecipitates with the N-terminal part of HOIP1.** HEK293T cells were transfected with V5-tagged PINK1 and the indicated HA-tagged HOIP constructs. One day after transfection cells were lysed under native conditions and subjected to immunoprecipitation using HA antibodies. Immunopurified proteins were analyzed by immunoblotting using V5 antibodies to detect PINK1.

**S2D. The UBA domain enhances the interaction between HOIP and PINK1.** HEK293T cells were analyzed as described in B.

**S2E. PINK1 co-elutes with HOIP in cellular lysates.** HEK293T cells expressing V5-tagged PINK1 were lysed, and soluble proteins were separated by size-exclusion chromatography. Fractions were collected and analyzed by immunoblotting using antibodies against HOIP and V5.

### Suppl. Figure 3. PINK1 impairs OTULIN activity *in vitro*

**S3A. The efficiency of OTULIN to hydrolyze M1-linked ubiquitin is decreased in the presence of PINK1.** Recombinant M1-linked tetra-ubiquitin was incubated with or without recombinant *Tribolium castaneum* tcPINK1 for 48 h. Then recombinant OTULIN was added

for the indicated time. The reaction was stopped by adding Laemmli sample buffer and the samples were analyzed by immunoblotting using ubiquitin antibodies.

**S3B. PINK1 phosphorylates M1-linked tetra-ubiquitin *in vitro*.** M1-linked tetra-ubiquitin was incubated with or without recombinant tcPINK1 in kinase buffer for 2 days. The samples were analyzed by Phos-tag<sup>TM</sup> SDS-PAGE and immunoblotting using ubiquitin antibodies.

#### **Suppl. Figure 4. TNF influences the bioenergetic profile**

**S4A, B. TNF increases maximal respiration (A) and spare respiratory capacity (B).** HeLa cells were treated with TNF for the indicated time and analyzed by the Agilent Seahorse XF Cell Mito Stress Test. The spare respiratory capacity is the difference between the maximal and the basal respiration.

**S4C. TNF increases total ATP production.** HeLa cells were treated with TNF for indicated time and analyzed by the Agilent Seahorse ATP Rate Assay.

#### **Suppl. Figure 5. Targeting, self-complementation and ability to respond to the MRR activation of the SPLICS<sup>NU-MT</sup> reporters.**

**S5A.** Assessment of the nuclear envelope localization of the ONM-targeted GFP<sub>1-10</sub> fragment at different concentrations of plasmid transfected in HeLa cells. The GFP<sub>1-10</sub> fragment was stained with a mouse anti-GFP primary antibody (Santa Cruz, 1:100) followed by an anti-mouse AlexaFluor 488-conjugated secondary antibody (ThermoFisher, 1:100).

**S5B.** Assessment of the self-complementation capability of the ONM targeted GFP<sub>1-10</sub> fragment with a cytosolic mKate-tagged  $\beta$ 11.

**S5C.** Nuclear envelope localization and self-complementation of the ONM-targeted  $\beta$ 11 fragment co-transfected with an untargeted, cytosolic GFP1-10 fragment. Nuclei were stained with Hoechst33342 (ThermoFisher, 1  $\mu$ g/ml).

**S5D.** Schematic representation of the contact quantification process using ImageJ plugin VolumeJ and custom-made macros specifically developed for the analysis: 1. a ROI is traced around the nucleus of the cell; 2. the first macro is applied, which clears all the signal outside the ROI and convolves the signal inside; 3. VolumeJ is used to generate a rendering of the convolved signal; 4. the second custom macro is applied on the first and the last frame of the rendering; 5. the contacts per each frame are quantified and the overall number of contacts per cell is calculated by averaging the two results.

**S5E.** Representative images and contact quantification of HeLa cells after induction of the mitochondrial retrograde response (MRR) upon treatment with rotenone (5  $\mu$ M for 3 h), CCCP (10  $\mu$ M for 3 h) or staurosporine (1  $\mu$ M for 2 h). Mitochondria were stained with MitoTracker Red CMXRos (ThermoFisher, 100 nM) in HBSS for 30 minutes. Nuclei were stained as described in C.

**Movie 1. TNF induces the movement of peripheral mitochondria towards the nucleus.**

SH-SY5Y cells were stained with NucSpot Live 488 and MitoView 650 for 30 min. After TNF treatment (25 ng/ml) the cells were imaged every 2 min for 30 min. Image analysis was performed by Imaris 9.8 using the Surface (nucleus) and Spot (mitochondria) algorithm. Mitochondrial distance with respect to the nuclear surface was color-coded (purple/blue = proximal; red/yellow = distal).
